# Supplementary material
Source: PubMed Central journal article supplement (PMC4638045)
Supplement: supp_M115.052894_mcp.M115.052894-1.pdf [file supp_M115.052894_mcp.M115.052894-1.pdf]

**Supplementary Material from *Interacting network of the gap junction protein connexin43 (Cx43) is modulated by ischemia and reperfusion in the heart***

Tania Martins-Marques\*<sup>1</sup>, Sandra Isabel Anjo\*<sup>2,3</sup>, Paulo Pereira<sup>1</sup>, Bruno Manadas<sup>‡2,4</sup>, Henrique Girão<sup>‡1</sup>

<sup>1</sup>Centre of Ophthalmology and Vision Sciences, Institute of Biomedical Imaging and Life Sciences (IBILI), Faculty of Medicine, University of Coimbra, Azinhaga de Sta Comba, 3000-354 Coimbra, Portugal

<sup>2</sup> CNC - Center for Neuroscience and Cell Biology, University of Coimbra, Portugal

<sup>3</sup> Faculty of Sciences and Technology, University of Coimbra, Portugal

<sup>4</sup> Biocant - Biotechnology Innovation Center, Cantanhede, Portugal

<sup>‡</sup>Corresponding author

Henrique Girao, [hmgirao@fmed.uc.pt](mailto:hmgirao@fmed.uc.pt)

Centre of Ophthalmology and Vision Sciences, Institute of Biomedical Imaging and Life Sciences (IBILI), Faculty of Medicine, University of Coimbra, Azinhaga de Sta Comba, 3000-354 Coimbra, Portugal

## Supplementary Figures

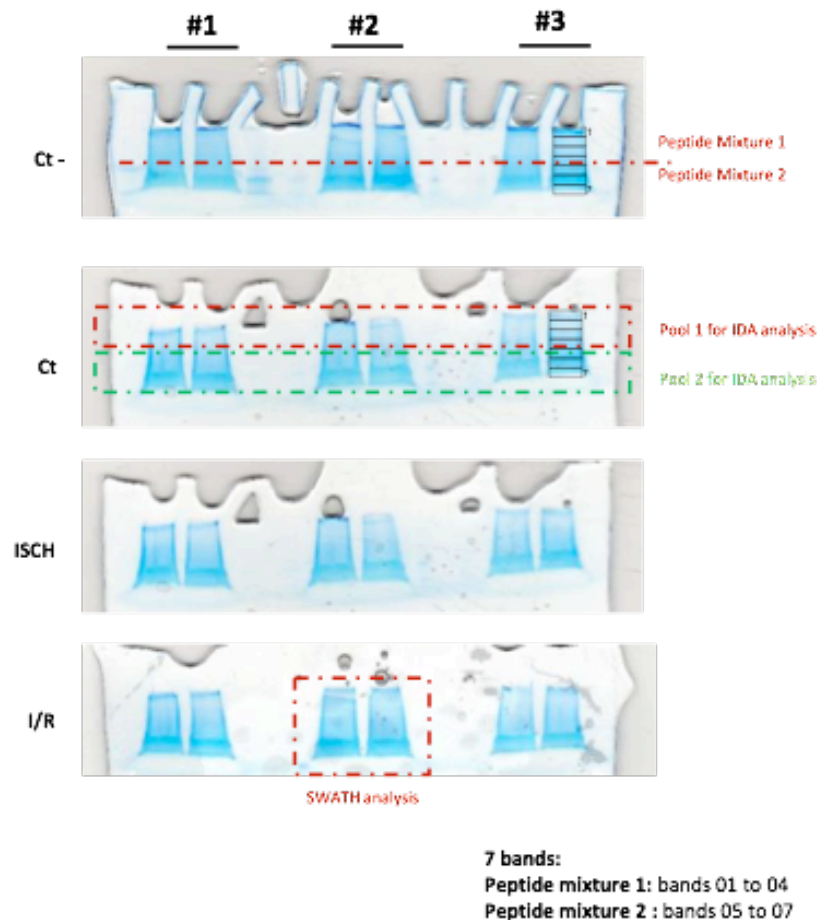

**Supplementary figure S1 – Short-GeLC approach used in sample preparation.** A partial electrophoretic separation of the immunopurified samples was visualized by staining with Colloidal Coomassie Blue. Gel lanes were sliced into 7 bands of equal size (as indicated by the grid-cutter), and further sliced into small pieces, for independent processing. Peptides extracted from different bands were pooled together in two-peptide mixtures (mixture 1 and mixture 2) per sample, for subsequent liquid chromatography (LC)-MS/MS analysis. For IDA experiments a pool of all the biological replicates was done, and for SWATH analysis the two peptide mixture of each sample were combined.

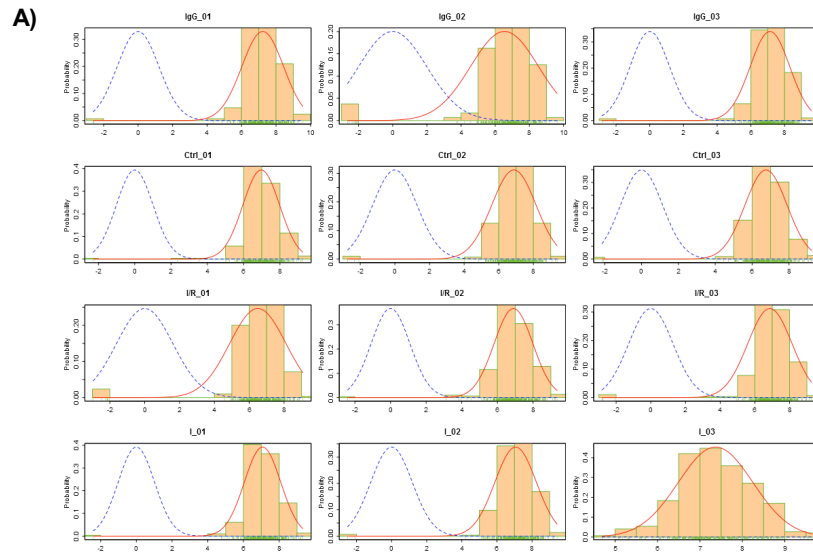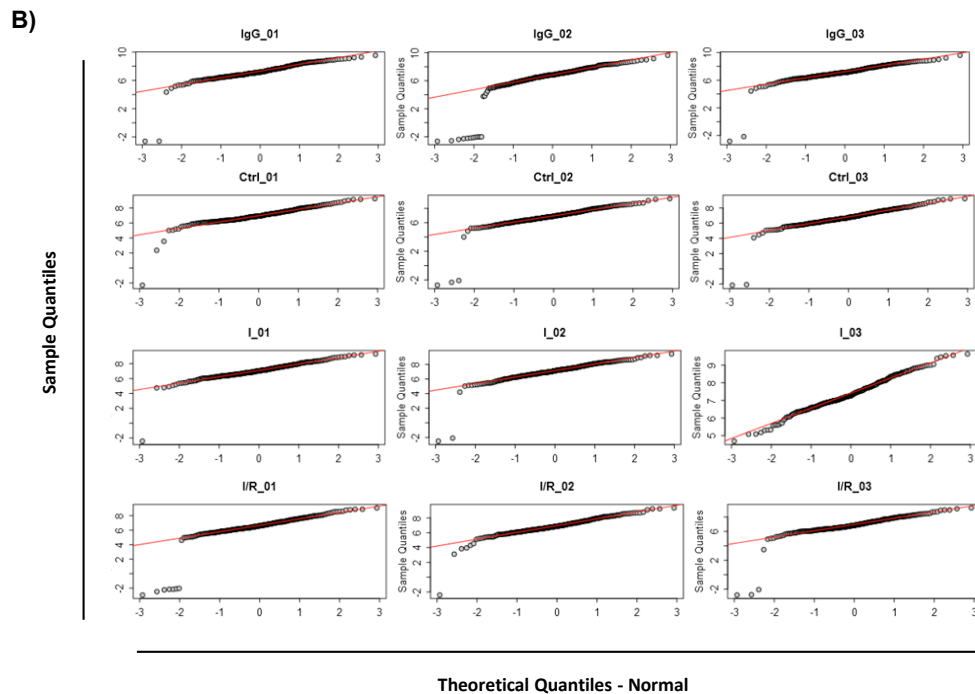

**Supplementary figure S2 – Evaluation of the normality of the SWATH data.** Normality was indirectly accessed by parallel histogram (A) q-q plots (B) analyses. The logarithmized quantitative data follows a normal distribution, therefore it can be compared by parametric statistical methods.

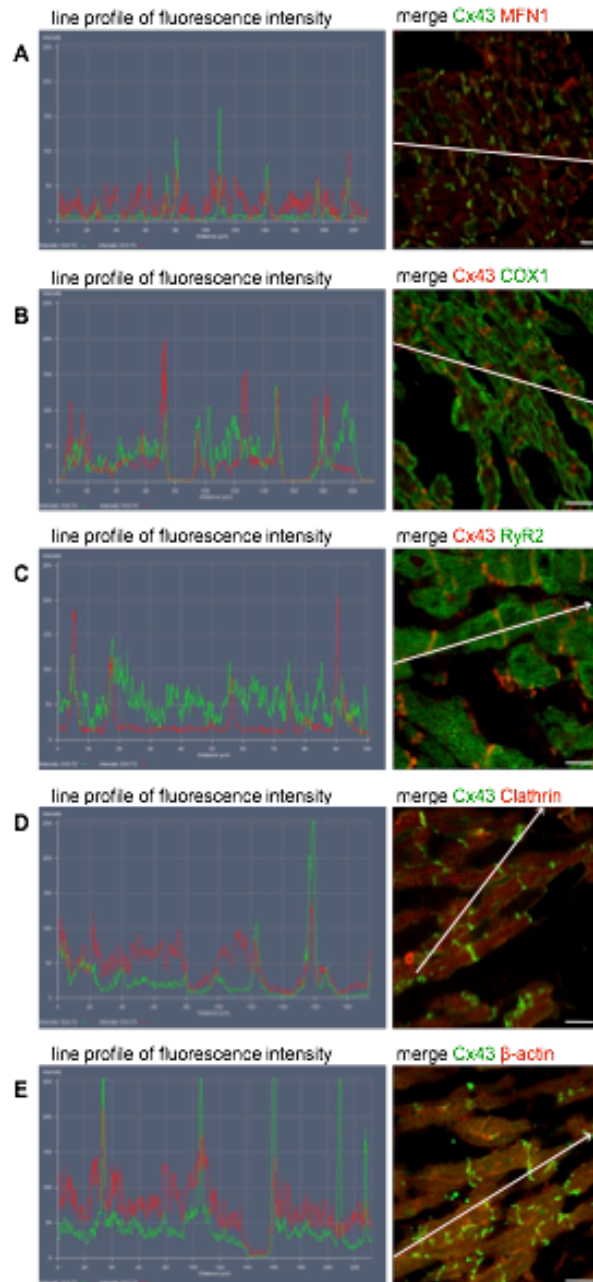

**Supplementary Figure S3 – RyR2, Mfn1 and COX1 co-localize with Cx43 in the rat heart.** Hearts from 10-week-old Wistar rats were maintained using a Langendorff apparatus for 10 min, followed by 20 min of perfusion (CT). Cryosections of control or ischemic hearts were immunostained using antibodies against **A.** Cx43 (Sc9059) and RyR2 **B.** Cx43 (610062) and Mfn1 **C.** Cx43 (Sc9059) and COX1 **D.** Cx43 (Sc9059) and Clathrin heavy chain **E.** Cx43 (Sc9059) and  $\beta$ -actin. Scale bars, 25  $\mu$ m. Co-localization graphs show the fluorescence intensity profile from a line (white arrows, right panels) crossing through

merged images (right panel). The coincidence of fluorescence intensity peaks (green and red) represents the co-localization between two proteins.

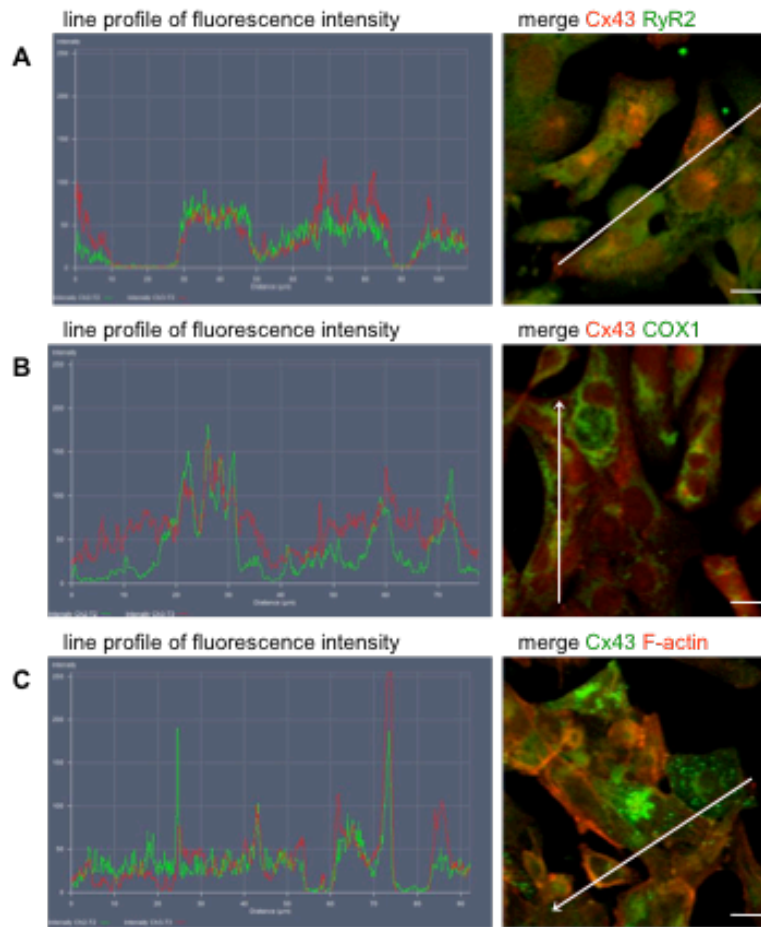

**Supplementary Figure S4 – RyR2 and COX1 co-localize with Cx43 in HL-1 cells.** Immunostaining for **A.** Cx43 (Sc9059) and RyR2 **B.** Cx43 (Sc9059) and COX1 **C.** Cx43 (610062) and F-actin (Phalloidin), in HL-1 cells. Scale bars, 20 µm. Co-localization graphs show the fluorescence intensity profile from a line (white arrows, right panels) crossing through merged images (right panel). The coincidence of fluorescence intensity peaks (green and red) represents the co-localization between two proteins.

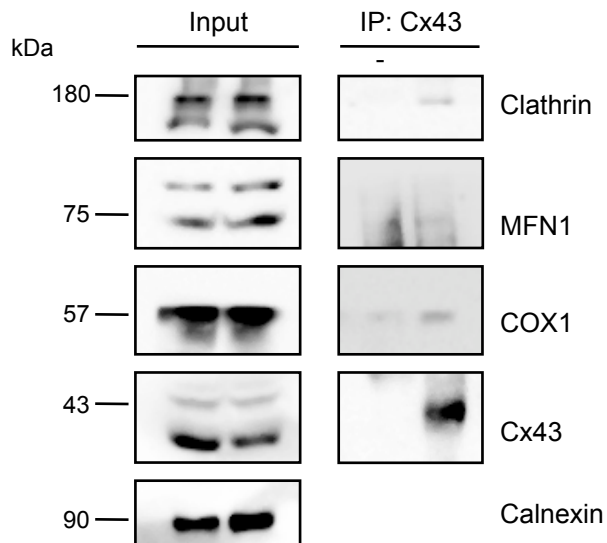

**Supplementary Figure S5** – Clathrin, Mfn1 and COX1 interact with Cx43 in the rat heart. Hearts from 10-week-old Wistar rats were maintained using a Langendorff apparatus for 10 min, followed by 20 min of perfusion. Heart lysates (Input) were immunoprecipitated (IP) using goat polyclonal antibodies directed against Cx43 (AB0016, Sicgen). Goat non-specific polyclonal antibodies (anti-GFP; AB0020, Sicgen) were used for control IP. WB analysis of the immunoprecipitates was performed using antibodies against Clathrin heavy chain, Mfn1 and COX1. Calnexin was used as loading control.

## Supplementary Tables

### Legends

**Supplementary Table S1** – List of all the proteins identified in our study.

**Supplementary Table S2** – List of all the proteins quantified by SWATH-MS.

**Supplementary Table S3** – Multiple t-test evaluation for each pair of experimental conditions.

**Supplementary Table S4** – Cx43-interacting proteins identified in the both the present study and in the Gago-fuentes et al. study, 2015

**Supplementary Table S5** – List of the 236 putative Cx43 interactors distributed by each respective cluster/profile of interaction.

**Supplementary Table S6** – ISCH-enriched Cx43-interacting partners. List of proteins which interaction with Cx43 is enhanced during ischemia.

**Supplementary Table S7 – I/R-enriched Cx43-interacting partners.** List of Cx43-interacting partners whose interaction is enhanced in I/R.
